# Supplementary material for: Methods of Visualizing the Results of an Artificial-Intelligence-Based Computer-Aided Detection System for Chest Radiographs: Effect on the Diagnostic Performance of Radiologists
Source: MDPI journal article supplement (doi:10.3390/diagnostics13061089), 2023-03-13
Supplement: s1 [file s1]

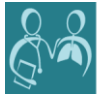

Table S1. Sensitivity, specificity and accuracy of Interpretation of Individual Readers.

1

| Visualization method | Sensitivity                 | Specificity               |                             |
|----------------------|-----------------------------|---------------------------|-----------------------------|
| <i>Reader 1</i>      |                             |                           |                             |
| closed-line method   | 67.9% (110/162; 60.1–75.0%) | 82.8% (72/87; 73.2–90.0%) | 73.1% (182/249; 67.1–78.5%) |
| heat map method      | 67.3% (109/162; 59.5–74.4%) | 82.8% (72/87; 73.2–90.0%) | 72.7% (181/249; 66.7–78.1%) |
| combined method      | 69.1% (112/162; 61.4–76.1%) | 82.8% (72/87; 73.2–90.0%) | 73.9% (184/249; 68.0–79.2%) |
| <i>Reader 2</i>      |                             |                           |                             |
| closed-line method   | 74.7% (121/162; 67.3–81.2%) | 88.5% (77/87; 79.9–94.3%) | 79.5% (198/249; 74.0–84.4%) |
| heat map method      | 78.4% (127/162; 70.8–84.0%) | 86.2% (75/87; 77.1–92.7%) | 81.1% (202/249; 75.7–85.8%) |
| combined method      | 78.4% (127/162; 70.8–84.0%) | 86.2% (75/87; 77.1–92.7%) | 81.1% (202/249; 75.7–85.8%) |
| <i>Reader 3</i>      |                             |                           |                             |
| closed-line method   | 50.0% (81/162; 42.1–57.9%)  | 90.8% (79/87; 82.7–95.9%) | 64.3% (160/249; 58.0–70.2%) |
| heat map method      | 54.3% (88/162; 46.3–62.2%)  | 96.6% (84/87; 90.3–99.3%) | 69.1% (172/249; 62.9–74.8%) |
| combined method      | 58.6% (95/162; 50.7–66.3%)  | 94.3% (82/87; 87.1–98.1%) | 71.1% (177/249; 65.0–76.6%) |
| <i>Reader 4</i>      |                             |                           |                             |
| closed-line method   | 78.4% (127/162; 70.8–84.0%) | 82.8% (72/87; 73.2–90.0%) | 79.9% (199/249; 74.4–84.7%) |
| heat map method      | 77.8% (126/162; 70.6–83.9%) | 85.1% (74/87; 75.8–91.8%) | 80.3% (200/249; 74.8–85.1%) |
| combined method      | 78.4% (127/162; 70.8–84.0%) | 83.9% (73/87; 74.5–90.9%) | 80.3% (200/249; 74.8–85.1%) |
| <i>Reader 5</i>      |                             |                           |                             |
| closed-line method   | 66.7% (108/162; 58.8–73.9%) | 97.7% (85/87; 91.9–99.7%) | 77.5% (193/249; 71.8–82.5%) |
| heat map method      | 70.4% (114/162; 62.7–77.3%) | 90.8% (79/87; 82.7–95.9%) | 77.5% (193/249; 71.8–82.5%) |
| combined method      | 69.1% (112/162; 61.4–76.1%) | 93.1% (81/87; 85.6–97.4%) | 77.5% (193/249; 71.8–82.5%) |

Numbers in parentheses indicate numerators/denominators; 95% confidence intervals.

2

3

Table S2. Detection Rates of Individual Readers.

| Visualization method | All abnormalities              | Pulmonary air-space opacity  | Pulmonary nodule or mass     | Pulmonary interstitial opacity | Pleural effusion             | Pneumothorax               | Others                    |
|----------------------|--------------------------------|------------------------------|------------------------------|--------------------------------|------------------------------|----------------------------|---------------------------|
| <i>Reader 1</i>      |                                |                              |                              |                                |                              |                            |                           |
| closed-line method   | 63.3%<br>(112/177; 55.7–70.4%) | 69.0% (20/29;<br>49.2–84.7%) | 59.6% (53/89;<br>48.6–69.8%) | 30.8% (4/13;<br>9.1–61.4%)     | 90.6% (29/32;<br>75.0–98.0%) | 71.4% (5/7;<br>29.0–96.3%) | 14.3% (1/7;<br>0.4–57.9%) |
| heat map method      | 64.4%<br>(114/177; 56.9–71.4%) | 62.1% (18/29;<br>42.3–79.3%) | 61.8% (55/89;<br>50.9–71.9%) | 30.8% (4/13;<br>9.1–61.4%)     | 90.6% (29/32;<br>75.0–98.0%) | 100% (7/7;<br>59.0–100%)   | 14.3% (1/7;<br>0.4–57.9%) |
| combined method      | 65.5%<br>(116/177; 58.0–72.5%) | 55.2% (16/29;<br>35.7–73.6%) | 67.4% (60/89;<br>56.7–77.0%) | 46.2% (6/13;<br>19.2–74.9%)    | 84.4% (27/32;<br>67.2–94.7%) | 85.7% (6/7;<br>42.1–99.6%) | 14.3% (1/7;<br>0.4–57.9%) |
| <i>Reader 2</i>      |                                |                              |                              |                                |                              |                            |                           |
| closed-line method   | 71.2%<br>(126/177; 63.9–77.7%) | 75.9% (22/29;<br>56.5–89.7%) | 73.0% (65/89;<br>62.6–81.9%) | 76.9% (10/13;<br>46.2–95.0%)   | 71.9% (23/32;<br>53.3–86.3%) | 85.7% (6/7;<br>42.1–99.6%) | 0% (0/7; 0–41.0%)         |
| heat map method      | 75.7%<br>(134/177; 68.7–81.8%) | 65.5% (19/29;<br>45.7–82.1%) | 79.8% (71/89;<br>69.9–87.6%) | 84.6% (11/13;<br>54.6–98.1%)   | 81.3% (26/32;<br>63.6–92.8%) | 100% (7/7;<br>59.0–100%)   | 0% (0/7; 0–41.0%)         |
| combined method      | 76.3%<br>(135/177; 69.3–82.3%) | 75.9% (22/29;<br>56.5–89.7%) | 78.7% (70/89;<br>68.7–86.6%) | 76.9% (10/13;<br>46.2–95.0%)   | 81.3% (26/32;<br>63.6–92.8%) | 100% (7/7;<br>59.0–100%)   | 0% (0/7; 0–41.0%)         |
| <i>Reader 3</i>      |                                |                              |                              |                                |                              |                            |                           |
| closed-line method   | 45.8% (81/177;<br>68.3–53.4%)  | 41.4% (12/29;<br>23.5–61.1%) | 46.1% (41/89;<br>35.4–57.0%) | 38.5% (5/13;<br>13.9–68.4%)    | 56.3% (18/32;<br>37.7–73.6%) | 71.4% (5/7;<br>29.0–96.3%) | 0% (0/7; 0–41.0%)         |
| heat map method      | 49.7% (88/177;<br>42.1–57.3%)  | 37.9% (11/29;<br>20.7–57.7%) | 48.3% (43/89;<br>37.6–59.2%) | 53.8% (7/13;<br>25.1–80.8%)    | 65.6% (21/32;<br>46.8–81.4%) | 85.7% (6/7;<br>42.1–99.6%) | 0% (0/7; 0–41.0%)         |
| combined method      | 53.7% (95/177;<br>46.0–61.2%)  | 44.8% (13/29;<br>26.4–64.3%) | 57.3 (51/89;<br>46.4–67.7%)  | 38.5% (5/13;<br>13.9–68.4%)    | 59.4% (19/32;<br>40.6–76.3%) | 100% (7/7;<br>59.0–100%)   | 0% (0/7; 0–41.0%)         |
| <i>Reader 4</i>      |                                |                              |                              |                                |                              |                            |                           |
| closed-line method   | 73.4%<br>(130/177; 66.3–79.8%) | 65.5% (19/29;<br>45.7–82.1%) | 79.8% (71/89;<br>69.9–87.6%) | 69.2% (9/13;<br>38.6–90.9%)    | 68.8% (22/32;<br>50.0–83.9%) | 100% (7/7;<br>59.0–100%)   | 28.6% (2/7;<br>3.7–71.0%) |
| heat map method      | 72.9%<br>(129/177; 65.7–79.3%) | 62.1% (18/29;<br>42.3–79.3%) | 82.0% (73/89;<br>72.5–89.4%) | 61.5% (8/13;<br>31.6–86.1%)    | 65.6% (21/32;<br>46.8–81.4%) | 100% (7/7;<br>59.0–100%)   | 28.6% (2/7;<br>3.7–71.0%) |
| combined method      | 74.0%<br>(131/177; 66.9–80.3%) | 75.9% (22/29;<br>56.5–89.7%) | 79.8% (71/89;<br>69.9–87.6%) | 69.2% (9/13;<br>38.6–90.9%)    | 65.6% (21/32;<br>46.8–81.4%) | 100% (7/7;<br>59.0–100%)   | 14.3% (1/7;<br>0.4–57.9%) |
| <i>Reader 5</i>      |                                |                              |                              |                                |                              |                            |                           |
| closed-line method   | 63.8%<br>(113/177; 56.3–70.9%) | 55.2% (16/29;<br>35.7–73.6%) | 67.4% (60/89;<br>56.7–77.0%) | 46.2% (6/13;<br>19.2–74.9%)    | 78.1% (25/32;<br>60.0–90.7%) | 85.7% (6/7;<br>42.1–99.6%) | 0% (0/7; 0–41.0%)         |
| heat map method      | 68.9%<br>(122/177; 61.5–75.7%) | 58.6% (17/29;<br>38.9–76.5%) | 70.8% (63/89;<br>60.2–79.9%) | 61.5% (8/13;<br>31.6–86.1%)    | 84.4% (27/32;<br>67.2–94.7%) | 100% (7/7;<br>59.0–100%)   | 0% (0/7; 0–41.0%)         |
| combined method      | 65.5%<br>(116/177; 58.0–72.5%) | 55.2% (16/29;<br>35.7–73.6%) | 68.5% (61/89;<br>57.8–78.0%) | 53.8% (7/13;<br>25.1–80.8%)    | 78.1% (25/32;<br>60.0–90.7%) | 100% (7/7;<br>59.0–100%)   | 0% (0/7; 0–41.0%)         |

Abbreviation: AI-CAD, artificial intelligence-based computer-aided detection.

Numbers in parentheses indicate numerators/denominators; 95% confidence intervals.

**Table S3.** Correlation between Preference, Subject Impression to Improve.

7

|                    | <b>Overall preference</b> | <b>Subjective impression to improve interpretation accuracy</b> | <b>Sensitivity</b> | <b>Specificity</b> | <b>Accuracy</b> | <b>Detection rate</b> |
|--------------------|---------------------------|-----------------------------------------------------------------|--------------------|--------------------|-----------------|-----------------------|
| <i>Reader 1</i>    |                           |                                                                 |                    |                    |                 |                       |
| closed-line method | 5                         | 3                                                               | 67.9%              | 82.8%              | 73.1%           | 63.3%                 |
| heat map method    | 2                         | 4                                                               | 67.3%              | 82.8%              | 72.7%           | 64.4%                 |
| combined method    | 4                         | 5                                                               | 69.1%              | 82.8%              | 73.9%           | 65.5%                 |
| <i>Reader 2</i>    |                           |                                                                 |                    |                    |                 |                       |
| closed-line method | 3                         | 4                                                               | 74.7%              | 88.5%              | 79.5%           | 71.2%                 |
| heat map method    | 4                         | 4                                                               | 78.4%              | 86.2%              | 81.1%           | 75.7%                 |
| combined method    | 3                         | 4                                                               | 78.4%              | 86.2%              | 81.1%           | 76.3%                 |
| <i>Reader 3</i>    |                           |                                                                 |                    |                    |                 |                       |
| closed-line method | 4                         | 4                                                               | 50.0%              | 90.8%              | 64.3%           | 45.8%                 |
| heat map method    | 4                         | 4                                                               | 54.3%              | 96.6%              | 69.1%           | 49.7%                 |
| combined method    | 5                         | 4                                                               | 58.6%              | 94.3%              | 71.1%           | 53.7%                 |
| <i>Reader 4</i>    |                           |                                                                 |                    |                    |                 |                       |
| closed-line method | 4                         | 4                                                               | 78.4%              | 82.8%              | 79.9%           | 73.4%                 |
| heat map method    | 4                         | 5                                                               | 77.8%              | 85.1%              | 80.3%           | 72.9%                 |
| combined method    | 5                         | 4                                                               | 78.4%              | 83.9%              | 80.3%           | 74.0%                 |
| <i>Reader 5</i>    |                           |                                                                 |                    |                    |                 |                       |
| closed-line method | 3                         | 5                                                               | 66.7%              | 97.7%              | 77.5%           | 63.8%                 |
| heat map method    | 4                         | 5                                                               | 70.4%              | 90.8%              | 77.5%           | 68.9%                 |
| combined method    | 5                         | 5                                                               | 69.1%              | 93.1%              | 77.5%           | 65.5%                 |

8
